# Supplementary material for: Obesogens beyond Vertebrates: Lipid Perturbation by Tributyltin in the Crustacean Daphnia magna
Source: PubMed Central journal article supplement (PMC4529017; doi:10.1289/ehp.1409163), 2015-03-24
Supplement: ehp.1409163.s001.acco.pdf [file ehp.1409163.s001.acco.pdf]

**Note to Readers:** *EHP* strives to ensure that all journal content is accessible to all readers.

However, some figures and Supplemental Material published in *EHP* articles may not conform to 508 standards due to the complexity of the information being presented. If you need assistance accessing journal content, please contact [ehp508@niehs.nih.gov](mailto:ehp508@niehs.nih.gov). Our staff will work with you to assess and meet your accessibility needs within 3 working days.

## **Supplemental Material**

### **Obesogens beyond Vertebrates: Lipid Perturbation by Tributyltin in the Crustacean *Daphnia magna***

Rita Jordão, Josefina Casas, Gemma Fabrias, Bruno Campos, Benjamín Piña, Marco F.L. Lemos, Amadeu M.V.M. Soares, Romà Tauler, and Carlos Barata

#### **Table of Contents**

**Table S1.** Internal standards used for the analysis of lipids in *D. magna*.

**Table S2.** Primer pairs designed.

**Table S3.** Repeated measurement ANOVA results on Life-History traits.

**Table S4.** Univariate parametric and non parametric ANOVA results on Life-History traits. ANOVA. and non parametric tests for survival, age at first reproduction, total offspring produced (Toffspring) and population growth rate (r) of females treated during the adolescent instar (parental Generation) and of offspring exposed during their egg provisioning stage (F1 Generation).

**Table S5.** Two way ANOVA on lipid classes and mRNA gene responses.

**Figure S1.** Diagram of the test protocol used to exposed *D. magna* and measure changes in lipids and lipid droplets. *D. magna* individuals were fed on high food during their growth until 2/3 of their third juvenile instar and then exposed to the studied food treatments, TBT and its solvent carrier during a little bite more than the adolescent instar.

**Figure S2.** Heat map and hierarchical clustering (K-Means) of the quantified lipid groups in *Daphnia magna* juveniles along the studied period of the adolescent instar in control (C), TBTL

(L) and TBT H (H) treatments. High and low lipid levels are in red and blue and those in yellow unchanged.

**Figure S3.** Mean levels of individual TG differentiated in clusters 2 (upper) and 3 (lower graph panel) depicted in Supplemental Material, Fig S2 for control (C ), TBTL and TBTH treatments along the adolescent instar at 0, 8, 16 and 24 h and in adults just after the forth molt without eggs (48 h) and in eggs. Lipid compounds are depicted in the legends.

**Table S1.** Internal standards used for the analysis of lipids in *D. magna*.

| Family                | Name                                                                     | Abbreviation | Molecular Formula                                                  | Molecular weight | Exact mass |
|-----------------------|--------------------------------------------------------------------------|--------------|--------------------------------------------------------------------|------------------|------------|
| Neutral glycerolipids | Triheptadecanoate 1,2,3-triheptadecanoyl-glycerol                        | TAGC51:0     | C <sub>54</sub> H <sub>104</sub> O <sub>6</sub>                    | 849.4            | 848.783    |
|                       | 1,3 (d5)-diheptadecanoyl-glycerol                                        | DAG C34:0    | C <sub>37</sub> H <sub>67</sub> D <sub>5</sub> O <sub>5</sub>      | 601.995          | 601.569    |
|                       | 1-heptadecanoyl-rac-glycerol                                             | MAG C17:0    | C <sub>20</sub> H <sub>40</sub> O <sub>4</sub>                     | 344.529          | 344.293    |
| Sterols               | cholest-5-en-3 $\beta$ -yl heptadecanoate                                | CE C17:0     | C <sub>44</sub> H <sub>81</sub> O <sub>2</sub> N                   | 639.089          | 638.6      |
| Phospholipids         | 1-hexadecanoyl(d31)-2-(9Z-octadecenoyl)-sn-glycero-3-phosphocholine      | d31PC 34:1   | C <sub>42</sub> H <sub>51</sub> D <sub>31</sub> NO <sub>8</sub> P  | 791.267          | 790.772    |
|                       | 1-hexadecanoyl(d31)-2-(9Z-octadecenoyl)-sn-glycero-3-phosphoethanolamine | d31PE 34:1   | C <sub>39</sub> H <sub>45</sub> D <sub>31</sub> NO <sub>8</sub> P  | 749.187          | 748.725    |
|                       | 1-hexadecanoyl(d31)-2-(9Z-octadecenoyl)-sn-glycero-3-[phospho-L-serine]  | d31PS 34:1   | C <sub>40</sub> H <sub>45</sub> D <sub>31</sub> NO <sub>10</sub> P | 815.179          | 814.697    |
| Lysophospholipids     | 1-(10Z-heptadecenoyl)-sn-glycero-3-phosphoethanolamine                   | LPE C17:1    | C <sub>22</sub> H <sub>44</sub> NO <sub>7</sub> P                  | 465.561          | 465.286    |
|                       | 1-(10Z-heptadecenoyl)-sn-glycero-3-phospho-L-serine                      | LPS C17:1    | C <sub>23</sub> H <sub>44</sub> NO <sub>9</sub> P                  | 531.552          | 531.257    |
|                       | 1-heptadecanoyl-sn-glycero-3-phosphate                                   | LPA C17:0    | C <sub>20</sub> H <sub>41</sub> O <sub>7</sub> P                   | 446.491          | 446.241    |
|                       | 1-heptadecanoyl-sn-glycero-3-phosphocholine                              | LPC C17:0    | C <sub>25</sub> H <sub>53</sub> NO <sub>7</sub> P                  | 509.657          | 509.348    |
| Sphingolipids         | N-lauroyl-D-erythro-sphingosylphosphorylcholine                          | SM C12:0     | C <sub>35</sub> H <sub>71</sub> N <sub>2</sub> O <sub>6</sub> P    | 646.922          | 646.505    |

**Table S2.** Primer pairs designed.

| <b>Genes</b>     | <b>Accession Number</b> | <b>Forward</b>          | <b>Reverse</b>         | <b>Amplicon size</b> |
|------------------|-------------------------|-------------------------|------------------------|----------------------|
| <i>G3PDH</i>     | AJ292555                | ACGAGACCCGAAAAACATTCC   | CAATGTGAGCATGGGCCTTT   | 100                  |
| <i>EcRB</i>      | AB274824                | CACCACAACCAACTGCATTTAC  | CCATTAATGTCAAGATCCCACA | 81                   |
| <i>HR3</i>       | FJ755466                | AAGGTCGAGGATGAAGTGCG    | AAAGACGCTACTATCGGGCG   | 81                   |
| <i>HR38</i>      | KM982449                | AGTGAGCGGAGTTCTGGCAG    | CGTGACATATAACCCGGAAGC  | 81                   |
| <i>Neverland</i> | KM893860                | CAAATGAGGGCAATACGCGT    | GATGCTCTCGGCGAGAACAT   | 81                   |
| <i>Hb2</i>       | AB021136                | CCCAGGTTCTTTTCCGCCTTC   | CGGATTGAGGAACATCGGC    | 81                   |
| <i>RXR</i>       | DQ530508                | GTGTCGAGTGCAAGGACGAG    | CCCATTCAACCAACTGGAAAA  | 100                  |
| <i>SRC</i>       | AB698070                | TACTAGGCGTCTTGCTGAATGAA | CCATAATTTGCAAGGCTCCG   | 81                   |
| <i>MET</i>       | AB698069                | CAAACAGCCAGAGATTACCGG   | GCACTGTTGGTTCCAGCATTC  | 81                   |

Primers has been obtained from existing sequences used for the analyses of gene transcriptomic changes.

**Table S3.** Repeated measurement ANOVA results on Life-History traits.

| <b>Parental Generation</b> |           |          | <b>F1 Generation</b> |           |          |
|----------------------------|-----------|----------|----------------------|-----------|----------|
| <b>Clutch size</b>         | <b>df</b> | <b>F</b> | <b>Clutch size</b>   | <b>df</b> | <b>F</b> |
| Brood                      | 1,26      | 851.1**  | Brood                | 1,25      | 213.4**  |
| Treatment                  | 3,26      | 15.1**   | Treatment            | 3,25      | 3.2*     |
| Brood x Treatment          | 3,26      | 4.5*     | Brood x Treatment    | 3,25      | 2.1 ns   |
|                            |           |          |                      |           |          |
| <b>Neonate size</b>        | <b>df</b> | <b>F</b> | <b>Neonate size</b>  | <b>df</b> | <b>F</b> |
| Brood                      | 1,26      | 368.4**  | Brood                | 1,25      | 357.6**  |
| Treatment                  | 3,26      | 12.7**   | Treatment            | 3,25      | 0.6 ns   |
| Brood x Treatment          | 3,26      | 5.8**    | Brood x Treatment    | 3,25      | 1.4 ns   |
|                            |           |          |                      |           |          |
| <b>Body length</b>         | <b>df</b> | <b>F</b> | <b>Body size</b>     | <b>df</b> | <b>F</b> |
| Brood                      | 1,28      | 3171.1** | Brood                | 1,25      | 839.4**  |
| Treatment                  | 3,28      | 3.9*     | Treatment            | 3,25      | 0.2 ns   |
| Brood x Treatment          | 3,28      | 8.3**    | Brood x Treatment    | 3,25      | 0.4 ns   |

Brood number was used as a repeated measure and treatment as a fixed factor for clutch and neonate size and body length across broods of females treated during the adolescent instar and of offspring exposed during their egg provisioning stage. ns  $p > .05$ ; \*  $.05 < p < .01$ , \*\*  $.01 < p < .001$ , \*\*\*  $p < .001$

**Table S4.** Univariate parametric and non parametric ANOVA results on Life-History traits. ANOVA. and non parametric tests for survival, age at first reproduction, total offspring produced (Toffspring) and population growth rate (r) of females treated during the adolescent instar (parental Generation) and of offspring exposed during their egg provisioning stage (F1 Generation).

| Parental Generation |                            |      |           | F1 Generation       |                            |      |           |
|---------------------|----------------------------|------|-----------|---------------------|----------------------------|------|-----------|
|                     |                            | df   | Statistic |                     |                            | df   | Statistic |
| Survival adult      | Wilcoxon (Gehan) Statistic | 3    | 2.4 ns    | Survival starvation | Chi-Square                 | 3    | 4.3 ns    |
|                     |                            |      |           | Survival juvenile   | Wilcoxon (Gehan) Statistic | 3    | 6.1 ns    |
|                     |                            |      |           | Survival adult      | Wilcoxon (Gehan) Statistic | 3    | 13.7**    |
| Age                 | Kruskal-Wallis             | 3    | 0 ns      | Age                 | Kruskal-Wallis             | 3    | 6.4 ns    |
| Toffspring          | ANOVA                      | 3,31 | 19.9**    | Toffspring          | ANOVA                      | 3,36 | 7.1**     |
| r                   | ANOVA                      | 3,36 | 4.6**     | r                   | ANOVA                      | 3,36 | 7.5**     |

Analyses were performed on survival, age at first reproduction, total offspring produced (Toffspring) and population growth rate (r) of females treated during the adolescent instar (parental Generation) and of offspring exposed during their egg provisioning stage (F1 Generation). ns  $p > .05$ ; \*  $.05 < p < .01$ , \*\*  $.01 < p < .001$ , \*\*\* $p < .001$

**Table S5.** Two way ANOVA on lipid classes and mRNA gene responses.

|                  | <b>Treatment</b> |          | <b>Time</b> |          | <b>Treatment x Time</b> |          |
|------------------|------------------|----------|-------------|----------|-------------------------|----------|
|                  | <b>df</b>        | <b>F</b> | <b>df</b>   | <b>F</b> | <b>df</b>               | <b>F</b> |
| <b>Lipids</b>    |                  |          |             |          |                         |          |
| PC               | 2,36             | 6.5**    | 5,36        | 43.6***  | 10,36                   | 2.4*     |
| LPC              | 2,33             | 2.1 ns   | 5,33        | 22.4***  | 10,33                   | 1.0 ns   |
| PE               | 2,36             | 8.4**    | 5,36        | 10.2***  | 10,36                   | 1.4 ns   |
| PS               | 2,36             | 6.5**    | 5,36        | 38.8***  | 10,36                   | 1.5 ns   |
| PI               | 2,36             | 7.1**    | 5,36        | 10.0***  | 10,36                   | 1.0 ns   |
| TG               | 2,36             | 0.6 ns   | 5,36        | 112.2*** | 10,36                   | 7.9***   |
| DG               | 2,36             | 14.9***  | 5,36        | 69.8***  | 10,36                   | 2.9**    |
| CE               | 2,36             | 12.2***  | 5,36        | 25.3***  | 10,36                   | 4.3**    |
| SM               | 2,36             | 10.1***  | 5,36        | 169.3*** | 10,36                   | 3.3**    |
| <b>Genes</b>     |                  |          |             |          |                         |          |
| <i>HR3</i>       | 2,47             | 4.7*     | 4,47        | 30.0***  | 8,47                    | 3.1**    |
| <i>EcR B</i>     | 2,47             | 17.1***  | 4,47        | 26.8***  | 8,47                    | 26.1***  |
| <i>Neverland</i> | 2,48             | 8.2**    | 4,48        | 20.2***  | 8,48                    | 1.6 ns   |
| <i>HR38</i>      | 2,48             | 0.5 ns   | 4,48        | 14.9 *** | 8,48                    | 1.9 ns   |
| <i>MET</i>       | 2,47             | 6.6**    | 4,47        | 29.5***  | 8,47                    | 3.1**    |
| <i>SCR</i>       | 2,47             | 18.8***  | 4,47        | 78.3***  | 8,47                    | 9.9***   |
| <i>Hb2</i>       | 2,48             | 2.7 ns   | 4,48        | 23.6***  | 8,48                    | 8.1***   |
| <i>RXR</i>       | 2,48             | 1.5 ns   | 4,48        | 42.7***  | 8,48                    | 3.2**    |

ANOVA results (Fisher's coefficient, F, degrees of freedom, df) comparing the response of lipid classes and mRNA gene responses across TBT treatments along the adolescent instar, in de-brooded females just after the forth molt and in eggs. For mRNA levels treatments did not included eggs. ns P>0.05; \* 0.05<P<0.01, \*\* 0.01<P<0.001, \*\*\*P< 0.001

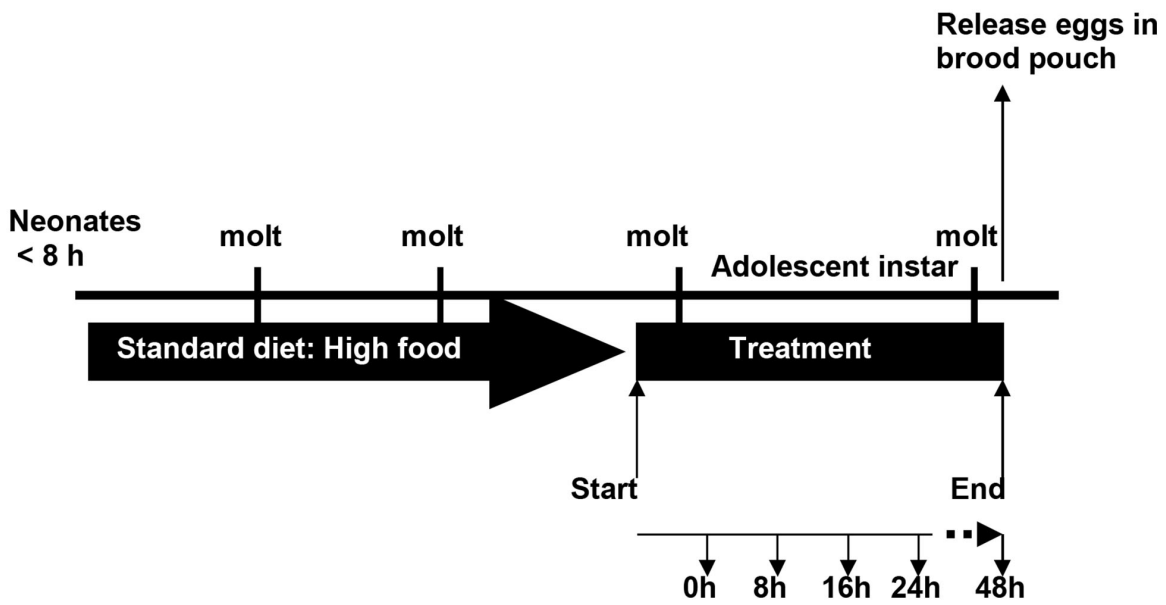

**Figure S1.** Diagram of the test protocol used to exposed *D. magna* and measure changes in lipids and lipid droplets. *D. magna* individuals were fed on high food during their growth until 2/3 of their third juvenile instar and then exposed to the studied food treatments, TBT and its solvent carrier during a little bite more than the adolescent instar.



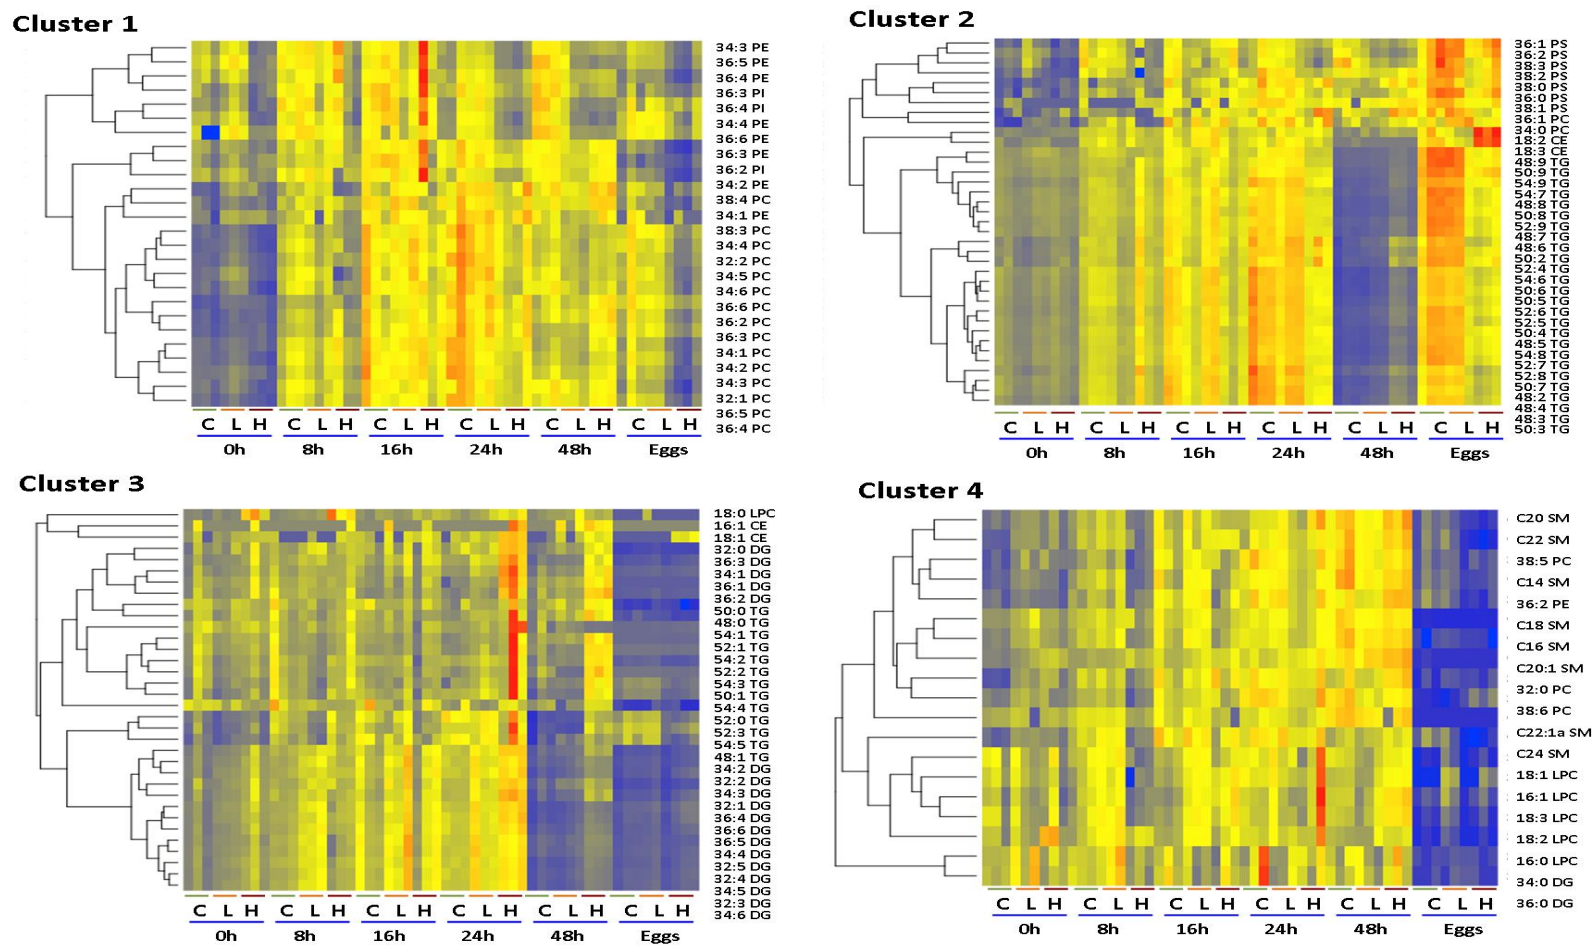

**Figure S2.** Heat map and hierarchical clustering (K-Means) of the quantified lipid groups in *Daphnia magna* juveniles along the studied period of the adolescent instar in control (C), TBTL (L) and TBT H (H) treatments. High and low lipid levels are in red and blue and those in yellow unchanged.

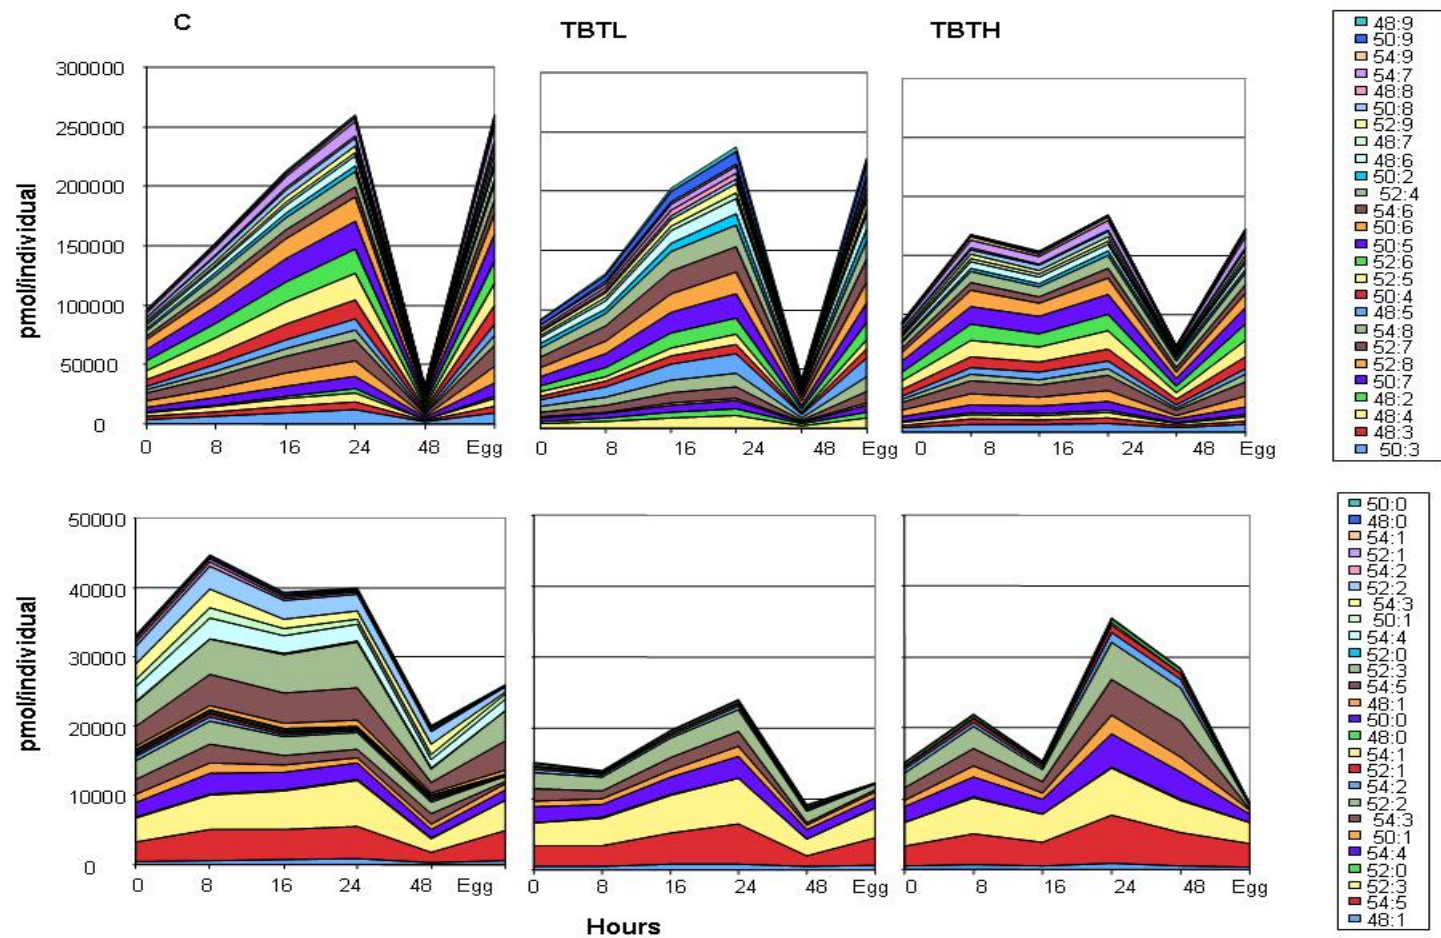

**Figure S3.** Mean levels of individual TG differentiated in clusters 2 (upper) and 3 (lower graph panel) depicted in Supplemental Material, Fig S2 for control (C), TBTL and TBTH treatments along the adolescent instar at 0, 8, 16 and 24 h and in adults just after the fourth molt without eggs (48 h) and in eggs. Lipid compounds are depicted in the legends.
